# Supplementary material
Source: publisher figshare collection journal article supplement (https://frontiersin.figshare.com/ndownloader/files/28395795)
Supplement: Supplementary file 1 [file 28395795]

## Sheet: Sheet1
Sort	Scientific Name	English Name	Order	Family	2019 IUCN Red List Threat Status	Endemic	Geographic Range	Elevation Range	Average Elevation	Body Mass	Hand-wing Index	Habitat Breadth	Forest Dependency	Diet	Trophic Level	Diet Breadth	Specialization Index	Average Clutch	Nest Type
1	Megapodius cumingii	Philippine Scrubfowl	Galliformes	Megapodiidae	LC	No	2050000	1850	1175	625	26.1367	3	High	Invertebrate	Carnivore	3	1.04576	NA	Closed
2	Polyplectron napoleonis	Palawan Peacock-pheasant	Galliformes	Phasianidae	VU	Yes	24000	800	400	379	18.6601	1	High	Seed	Herbivore	1	2	2	Open
3	Synoicus chinensis	Asian Blue Quail	Galliformes	Phasianidae	LC	No	35200000	2000	1000	38.5	22.1636	4	Non-forest	Seed	Herbivore	3	0.920819	6.5	Open
4	Gallus gallus	Red Junglefowl	Galliformes	Phasianidae	LC	No	33900000	2400	1200	914.25	23.2171	6	Low	Seed	Herbivore	3	0.744727	8	Open
5	Dendrocygna guttata	Spotted Whistling-duck	Anseriformes	Anatidae	LC	No	5250000	1000	500	677.5	26.8915	4	Non-forest	Seed	Herbivore	3	0.920819	10.5	Closed
6	Dendrocygna arcuata	Wandering Whistling-duck	Anseriformes	Anatidae	LC	No	23400000	500	250	779.5	30.9034	2	Non-forest	Plant	Herbivore	1	1.69897	10.5	Open
7	Nettapus coromandelianus	Cotton Pygmy-Goose	Anseriformes	Anatidae	LC	No	33800000	500	250	251.75	43.9322	2	Non-forest	Seed	Herbivore	3	1.22185	11	Closed
8	Anas luzonica	Philippine Duck	Anseriformes	Anatidae	VU	Yes	887000	400	200	851	44.3096	3	Low	Plant	Herbivore	5	0.823909	11.5	Open
9	Tachybaptus ruficollis	Little Grebe	Podicipediformes	Podicipedidae	LC	No	170000000	1000	500	183	32.501	3	Non-forest	Invertebrate	Carnivore	3	1.04576	4	Open
10	Columba vitiensis	Metallic Pigeon	Columbiformes	Columbidae	LC	No	18200000	2750	1375	388.5	32.3365	2	Medium	Fruit	Herbivore	5	1	1.5	Open
11	Streptopelia dusumieri	Philippine Collared-dove	Columbiformes	Columbidae	VU	Yes	1050000	600	300	159.5	30.923	2	Medium	Seed	Herbivore	3	1.22185	2.5	Open
12	Streptopelia tranquebarica	Red Turtle-dove	Columbiformes	Columbidae	LC	No	19000000	1300	650	104	39.6546	3	Medium	Seed	Herbivore	2	1.22185	2	Open
13	Spilopelia chinensis	Eastern Spotted Dove	Columbiformes	Columbidae	LC	No	16800000	2400	1200	143.5	30.6093	4	Medium	Seed	Herbivore	1	1.39794	2	Open
14	Macropygia tenuirostris	Philippine Cuckoo-dove	Columbiformes	Columbidae	LC	No	1140000	1600	800	174	33.2631	2	Medium	Fruit	Herbivore	1	1.69897	1	Open
15	Gallicolumba luzonica	Luzon Bleeding-heart	Columbiformes	Columbidae	NT	Yes	212000	1000	500	190	27.4125	1	High	Seed	Herbivore	3	1.52288	2	Open
16	Gallicolumba crinigera	Mindanao Bleeding-heart	Columbiformes	Columbidae	VU	Yes	264000	500	350	192.5	28.6389	1	High	Invertebrate	Carnivore	3	1.52288	1	Open
17	Gallicolumba platenae	Mindoro Bleeding-heart	Columbiformes	Columbidae	CR	Yes	6800	270	165	170	27.6091	1	High	Fruit	Herbivore	1	2	2	Open
18	Gallicolumba keayi	Negros Bleeding-heart	Columbiformes	Columbidae	CR	Yes	41100	900	750	186	32.8004	1	High	Seed	Herbivore	3	1.52288	2	Open
19	Gallicolumba menagei	Sulu Bleeding-heart	Columbiformes	Columbidae	CR	Yes	780	500	250	170	30.1906	1	High	Seed	Herbivore	3	1.52288	1.5	Open
20	Geopelia striata	Zebra Dove	Columbiformes	Columbidae	LC	No	6960000	900	450	61	27.7349	3	Non-forest	Seed	Herbivore	2	1.22185	2	Open
21	Caloenas nicobarica	Nicobar Pigeon	Columbiformes	Columbidae	NT	No	16200000	700	350	518.75	32.8176	3	Medium	Fruit	Herbivore	2	1.22185	1	Open
22	Chalcophaps indica	Grey-capped Emerald Dove	Columbiformes	Columbidae	LC	No	21300000	1000	500	130.667	28.6952	7	Medium	Seed	Herbivore	4	0.552842	2	Open
23	Phapitreron leucotis	White-eared Brown-dove	Columbiformes	Columbidae	LC	Yes	251000	1500	750	111	34.8884	2	Medium	Fruit	Herbivore	2	1.39794	2	Open
24	Phapitreron nigrorum	Buff-eared Brown-dove	Columbiformes	Columbidae	LC	Yes	77600	1600	800	112.5	34.8884	3	Medium	Fruit	Herbivore	2	1.22185	2	Open
25	Phapitreron brevirostris	Short-billed Brown-dove	Columbiformes	Columbidae	LC	Yes	306000	1600	800	104	34.8884	3	Medium	Fruit	Herbivore	2	1.22185	2	Open
26	Phapitreron amethystinus	Amethyst Brown-dove	Columbiformes	Columbidae	LC	Yes	631000	1500	1750	132.333	33.4453	1	High	Fruit	Herbivore	2	1.69897	2	Open
27	Phapitreron maculipectus	Grey-breasted Brown-dove	Columbiformes	Columbidae	NT	Yes	30600	1500	1750	145	33.4453	1	High	Fruit	Herbivore	2	1.69897	2	Open
28	Phapitreron frontalis	Cebu Brown-dove	Columbiformes	Columbidae	CR	Yes	550	1500	1750	145	33.4453	1	High	Fruit	Herbivore	2	1.69897	2	Open
29	Phapitreron brunneiceps	Dark-eared Brown-dove	Columbiformes	Columbidae	VU	Yes	166000	1500	750	145	36.2495	1	High	Fruit	Herbivore	2	1.69897	2	Open
30	Phapitreron cinereiceps	Tawitawi Brown-dove	Columbiformes	Columbidae	EN	Yes	930	1000	1500	145.333	32.49	1	High	Fruit	Herbivore	2	1.69897	2	Open
31	Treron vernans	Pink-necked Green-pigeon	Columbiformes	Columbidae	LC	No	9130000	500	250	132.5	32.7586	4	Medium	Fruit	Herbivore	2	1.09691	2	Open
32	Treron axillaris	Philippine Green-pigeon	Columbiformes	Columbidae	LC	Yes	1160000	1000	500	198	35.9898	1	High	Fruit	Herbivore	1	2	2	Open
33	Treron curvirostra	Thick-billed Green-pigeon	Columbiformes	Columbidae	LC	No	9970000	1500	750	148.667	34.8485	4	Medium	Fruit	Herbivore	1	1.39794	2	Open
34	Treron formosae	Taiwan Green-pigeon	Columbiformes	Columbidae	NT	No	101000	2000	1000	240	35.34	3	Medium	Fruit	Herbivore	1	1.52288	2	Open
35	Ducula poliocephala	Pink-bellied Imperial-pigeon	Columbiformes	Columbidae	NT	Yes	830000	1100	950	537	29.827	1	High	Fruit	Herbivore	1	2	1	Open
36	Ducula mindorensis	Mindoro Imperial-pigeon	Columbiformes	Columbidae	EN	Yes	3900	1000	1200	507.19	27.5938	1	High	Fruit	Herbivore	1	2	1	Open
37	Ducula carola	Spotted Imperial-pigeon	Columbiformes	Columbidae	VU	Yes	603000	2000	1000	289	36.4414	1	High	Fruit	Herbivore	1	2	1	Open
38	Ducula aenea	Green Imperial-pigeon	Columbiformes	Columbidae	LC	No	16800000	500	250	504.5	30.7637	3	Medium	Fruit	Herbivore	2	1.22185	1.5	Open
39	Ducula pickeringii	Grey Imperial-pigeon	Columbiformes	Columbidae	VU	No	595000	500	250	507.19	31.4968	2	Medium	Fruit	Herbivore	1	1.69897	1	Open
40	Ducula bicolor	Pied Imperial-pigeon	Columbiformes	Columbidae	LC	No	10500000	1100	550	452.667	36.6422	3	Medium	Fruit	Herbivore	1	1.52288	1.5	Open
41	Ramphiculus merrilli	Cream-bellied Fruit-dove	Columbiformes	Columbidae	NT	Yes	193000	1300	650	263	22.6825	1	High	Fruit	Herbivore	1	2	1	Open
42	Ramphiculus marchei	Flame-breasted Fruit-dove	Columbiformes	Columbidae	VU	Yes	114000	2150	1525	326.5	18.8125	1	High	Fruit	Herbivore	1	2	1	Open
43	Ramphiculus leclancheri	Black-chinned Fruit-dove	Columbiformes	Columbidae	LC	No	1250000	700	350	162	32.781	1	Medium	Fruit	Herbivore	1	2	1	Open
44	Ramphiculus occipitalis	Yellow-breasted Fruit-dove	Columbiformes	Columbidae	LC	Yes	654000	1800	900	236.25	26.6719	1	Medium	Fruit	Herbivore	1	2	1	Open
45	Ptilinopus arcanus	Negros Fruit-dove	Columbiformes	Columbidae	CR	Yes	120	0	1090	118.52	25.3	1	High	Fruit	Herbivore	1	2	1	Open
46	Ptilinopus melanospilus	Black-naped Fruit-dove	Columbiformes	Columbidae	LC	No	4060000	800	400	106	26.2876	4	Medium	Fruit	Herbivore	1	1.39794	1	Open
47	Batrachostomus septimus	Philippine Frogmouth	Caprimulgiformes	Podargidae	LC	Yes	654000	2500	1250	84.4	23.6178	1	High	Invertebrate	Carnivore	1	2	1	Open
48	Batrachostomus javensis	Horsfield's Frogmouth	Caprimulgiformes	Podargidae	LC	No	5810000	1700	850	46.5	23.6534	3	Medium	Invertebrate	Carnivore	1	1.52288	1.5	Open
49	Lyncornis macrotis	Great Eared-nightjar	Caprimulgiformes	Caprimulgidae	LC	No	13100000	1000	500	151	54.0552	5	Medium	Invertebrate	Carnivore	1	1.30103	1	Open
50	Caprimulgus macrurus	Large-tailed Nightjar	Caprimulgiformes	Caprimulgidae	LC	No	22400000	2700	1350	66.25	47.1358	10	Low	Invertebrate	Carnivore	1	1	1.5	Open
51	Caprimulgus manillensis	Philippine Nightjar	Caprimulgiformes	Caprimulgidae	LC	Yes	654000	2000	1000	64	48.1466	5	Medium	Invertebrate	Carnivore	1	1.30103	1.5	Open
52	Caprimulgus affinis	Savanna Nightjar	Caprimulgiformes	Caprimulgidae	LC	No	20100000	1500	750	81.25	45.3166	8	Low	Invertebrate	Carnivore	1	1.09691	1.5	Open
53	Hemiprocne comata	Whiskered Treeswift	Apodiformes	Hemiprocnidae	LC	No	6510000	1100	550	21.8	56.2002	2	Medium	Invertebrate	Carnivore	1	1.69897	1	Closed
54	Mearnsia picina	Philippine Spinetail	Apodiformes	Apodidae	NT	Yes	275000	1250	625	11.5	71.4538	1	High	Invertebrate	Carnivore	1	2	NA	Closed
55	Hirundapus giganteus	Brown-backed Needletail	Apodiformes	Apodidae	LC	No	11700000	500	250	145	64.0885	4	Medium	Invertebrate	Carnivore	1	1.39794	4	Open
56	Hirundapus celebensis	Purple Needletail	Apodiformes	Apodidae	LC	No	1170000	1850	1075	186.5	70.8973	2	Low	Invertebrate	Carnivore	1	1.69897	NA	Open
57	Collocalia troglodytes	Pygmy Swiftlet	Apodiformes	Apodidae	LC	Yes	888000	500	250	6.6	68.6499	3	Medium	Invertebrate	Carnivore	1	1.52288	1.5	Open
58	Collocalia esculenta	Glossy Swiftlet	Apodiformes	Apodidae	LC	No	21000000	3600	1800	9.1	68.3331	2	Non-forest	Invertebrate	Carnivore	1	1.69897	1.5	Open
59	Aerodramus whiteheadi	Whitehead's Swiftlet	Apodiformes	Apodidae	DD	Yes	170000	800	1600	14	69.1912	1	High	Invertebrate	Carnivore	1	2	NA	Closed
60	Aerodramus vanikorensis	Uniform Swiftlet	Apodiformes	Apodidae	LC	No	11200000	1600	800	11	68.9504	3	Medium	Invertebrate	Carnivore	1	1.52288	1.5	Open
61	Aerodramus mearnsi	Philippine Swiftlet	Apodiformes	Apodidae	LC	Yes	856000	900	1150	11	67.9288	1	Low	Invertebrate	Carnivore	1	2	4	Closed
62	Aerodramus fuciphagus	Edible-nest Swiftlet	Apodiformes	Apodidae	LC	No	8910000	2800	1400	15.9333	66.2323	4	Low	Invertebrate	Carnivore	1	1.39794	2	Open
63	Cypsiurus balasiensis	Asian Palm-swift	Apodiformes	Apodidae	LC	No	17700000	500	250	8.2	68.2716	4	Low	Invertebrate	Carnivore	1	1.39794	2	Open
64	Apus nipalensis	House Swift	Apodiformes	Apodidae	LC	No	20700000	1525	762.5	22.5	67.5784	2	Low	Invertebrate	Carnivore	1	1.69897	3	Open
65	Centropus unirufus	Rufous Coucal	Cuculiformes	Cuculidae	NT	Yes	214000	1200	600	184	13.5675	2	High	Invertebrate	Carnivore	2	1.39794	3	Closed
66	Centropus melanops	Black-faced Coucal	Cuculiformes	Cuculidae	LC	Yes	262000	1200	600	213.5	6.66055	2	Medium	Invertebrate	Carnivore	2	1.39794	3	Closed
67	Centropus steerii	Black-hooded Coucal	Cuculiformes	Cuculidae	CR	Yes	11700	750	375	200.75	4.95705	1	High	Invertebrate	Carnivore	1	2	3	Closed
68	Centropus sinensis	Greater Coucal	Cuculiformes	Cuculidae	LC	No	19600000	1200	600	252	13.2318	8	Low	Vertebrate	Carnivore	4	0.49485	3	Closed
69	Centropus viridis	Philippine Coucal	Cuculiformes	Cuculidae	LC	Yes	711000	2000	1000	131.5	14.7401	2	Non-forest	Invertebrate	Carnivore	1	1.69897	3	Closed
70	Centropus bengalensis	Lesser Coucal	Cuculiformes	Cuculidae	LC	No	21100000	1800	900	120	18.5922	5	Non-forest	Invertebrate	Carnivore	3	0.823909	3	Closed
71	Phaenicophaeus curvirostris	Chestnut-breasted Malkoha	Cuculiformes	Cuculidae	LC	No	5160000	1200	600	158.25	10.6579	4	Medium	Invertebrate	Carnivore	2	1.09691	2.5	Open
72	Dasylophus superciliosus	Red-crested Malkoha	Cuculiformes	Cuculidae	LC	Yes	144000	700	450	117.5	9.99043	3	Medium	Invertebrate	Carnivore	2	1.22185	NA	Open
73	Lepidogrammus cumingi	Scale-feathered Malkoha	Cuculiformes	Cuculidae	LC	Yes	168000	2000	1000	167.175	6.83009	1	High	Invertebrate	Carnivore	2	1.69897	2.5	Open
74	Eudynamys scolopaceus	Western Koel	Cuculiformes	Cuculidae	LC	No	34200000	1200	600	198.5	31.3665	4	Medium	Fruit	Herbivore	1	1.39794	11	NA
75	Chalcites minutillus	Little Bronze-Cuckoo	Cuculiformes	Cuculidae	LC	No	15800000	1400	700	17.35	36.897	3	Medium	Invertebrate	Carnivore	1	1.52288		NA
76	Chrysococcyx xanthorhynchus	Violet Cuckoo	Cuculiformes	Cuculidae	LC	No	10600000	700	350	21	41.0203	4	Medium	Invertebrate	Carnivore	2	1.09691		NA
77	Cacomantis sonneratii	Banded Bay Cuckoo	Cuculiformes	Cuculidae	LC	No	14800000	900	450	37	33.2326	5	Medium	Invertebrate	Carnivore	1	1.30103		NA
78	Cacomantis merulinus	Plaintive Cuckoo	Cuculiformes	Cuculidae	Lc	No	12900000	3000	1500	25.75	32.4846	6	Low	Invertebrate	Carnivore	2	0.920819		NA
79	Cacomantis variolosus	Brush Cuckoo	Cuculiformes	Cuculidae	LC	No	24900000	2500	1250	34	39.4817	4	Medium	Invertebrate	Carnivore	1	1.39794	NA	NA
80	Surniculus lugubris	Square-tailed Drongo-cuckoo	Cuculiformes	Cuculidae	LC	No	7750000	2100	1050	34.8	33.2515	6	Medium	Invertebrate	Carnivore	2	0.920819		NA
81	Surniculus velutinus	Philippine Drongo-cuckoo	Cuculiformes	Cuculidae	LC	Yes	828000	1000	500	36	25.8762	3	Medium	Invertebrate	Carnivore	2	1.22185	2	NA
82	Hierococcyx pectoralis	Philippine Hawk-cuckoo	Cuculiformes	Cuculidae	LC	Yes	881000	2400	1200	80	27.3927	1	Medium	Invertebrate	Carnivore	2	1.69897	NA	NA
83	Rallina fasciata	Red-legged Crake	Gruiformes	Rallidae	LC	No	10700000	800	400	88.15	27.5145	6	Non-forest	Invertebrate	Carnivore	2	0.920819	4.5	Open
84	Rallina eurizonoides	Slaty-legged Crake	Gruiformes	Rallidae	LC	No	19100000	1600	800	116.75	23.1881	6	Medium	Invertebrate	Carnivore	3	0.744727	6	Open
85	Lewinia striata	Slaty-breasted Rail	Gruiformes	Rallidae	LC	No	19000000	1850	925	121	24.1659	6	Low	Invertebrate	Carnivore	3	0.744727	7	Open
86	Lewinia mirifica	Brown-banded Rail	Gruiformes	Rallidae	DD	Yes	28200	1700	1400	95.67	27.5542	2	Low	Invertebrate	Carnivore	2	1.39794	NA	Open
87	Gallirallus calayanensis	Calayan Rail	Gruiformes	Rallidae	VU	Yes	70	300	150	245	9.92667	2	High	Invertebrate	Carnivore	1	1.69897	3	Open
88	Hypotaenidia torquata	Barred Rail	Gruiformes	Rallidae	LC	No	2660000	1000	500	241	23.8689	4	Non-forest	Invertebrate	Carnivore	3	0.920819	3.5	Open
89	Hypotaenidia philippensis	Buff-banded Rail	Gruiformes	Rallidae	LC	No	41700000	3600	1800	210	26.5042	9	Low	Omnivore	Carnivore	7	0.200659	8	Open
90	Zapornia fusca	Ruddy-breasted Crake	Gruiformes	Rallidae	LC	No	31400000	2000	1000	60	22.2639	6	Non-forest	Invertebrate	Carnivore	3	0.744727	6	Open
91	Zapornia tabuensis	Spotless Crake	Gruiformes	Rallidae	LC	No	57100000	3300	1650	42.25	29.5222	7	Non-forest	Invertebrate	Carnivore	5	0.455932	4	Open
92	Amaurornis olivacea	Philippine Bush-hen	Gruiformes	Rallidae	LC	Yes	877000	500	250	209	23.5737	3	Non-forest	Invertebrate	Carnivore	4	0.920819	5.5	Open
93	Amaurornis phoenicurus	White-breated Waterhen	Gruiformes	Rallidae	LC	No	39300000	1500	750	230.5	23.1879	8	Low	Omnivore	Carnivore	4	0.49485	6.5	Open
94	Amaurornis cinerea	White-browed Crake	Gruiformes	Rallidae	LC	No	32500000	1830	915	51.25	24.426	6	Low	Invertebrate	Carnivore	5	0.522879	5	Open
95	Gallicrex cinerea	Watercock	Gruiformes	Rallidae	LC	No	31400000	1000	500	396	31.6134	3	Non-forest	Omnivore	Carnivore	3	1.04576	4.5	Open
96	Porphyrio porphyrio	Purple Swamphen	Gruiformes	Rallidae	LC	No	50200000	2300	1150	892.5	30.4015	4	Non-forest	Omnivore	Carnivore	6	0.619789	4.5	Open
97	Gallinula chloropus	Common Moorhen	Gruiformes	Rallidae	LC	No	143000000	1700	850	231.75	30.1365	3	Non-forest	Omnivore	Carnivore	6	0.744727	7	Open
98	Plegadis falcinellus	Glossy Ibis	Pelecaniformes	Threskiornithidae	LC	No	223000000	500	250	595	41.8992	4	Non-forest	Invertebrate	Carnivore	3	0.920819	3.5	Open
99	Ixobrychus sinensis	Yellow Bittern	Pelecaniformes	Ardeidae	LC	No	51500000	1500	750	92.5	30.9427	5	Low	Invertebrate	Carnivore	3	0.823909	4	Open
100	Ixobrychus cinnamomeus	Cinnamon Bittern	Pelecaniformes	Ardeidae	LC	No	26400000	1980	990	126.75	25.5918	4	Low	Fish	Carnivore	3	0.920819	4	Open
101	Ixobrychus flavicollis	Black Bittern	Pelecaniformes	Ardeidae	LC	No	49200000	1200	600	314	30.4387	4	Medium	Carnivore	Carnivore	3	0.920819	4	Open
102	Gorsachius melanolophus	Malay Night-Heron	Pelecaniformes	Ardeidae	LC	No	10400000	800	400	414	30.6803	4	Non-forest	Carnivore	Carnivore	3	0.920819	3	Open
103	Nycticorax nycticorax	Black-crowned Night-heron	Pelecaniformes	Ardeidae	LC	No	296000000	4816	2408	689	33.0352	4	Low	Carnivore	Carnivore	3	0.920819	4	Open
104	Nycticorax caledonicus	Rufous Night-heron	Pelecaniformes	Ardeidae	LC	No	31600000	1600	800	782	29.7414	6	Low	Carnivore	Carnivore	4	0.619789	2.5	Open
105	Butorides striata	Green-backed Heron	Pelecaniformes	Ardeidae	LC	No	303000000	3000	1500	192.5	32.0058	4	Low	Fish	Carnivore	3	0.920819	3.5	Open
106	Ardeola speciosa	Javan Pond-heron	Pelecaniformes	Ardeidae	LC	No	6360000	500	250	286	26.3334	2	Low	Fish	Carnivore	3	1.22185	3.5	Open
107	Bubulcus ibis	Cattle Egret	Pelecaniformes	Ardeidae	LC	No	394000000	1500	750	323.75	26.9956	5	Low	Invertebrate	Carnivore	2	1	3	Open
108	Ardea sumatrana	Great-billed Heron	Pelecaniformes	Ardeidae	LC	No	16200000	500	250	1950	28.8093	3	Low	Fish	Carnivore	2	1.22185	2	Open
109	Ardea purpurea	Purple Heron	Pelecaniformes	Ardeidae	LC	No	131000000	1500	750	873.75	34.0738	3	Low	Carnivore	Carnivore	3	1.04576	4.5	Open
110	Ardea alba	Great White Egret	Pelecaniformes	Ardeidae	LC	No	368000000	1800	900	1200	25.696	4	Non-forest	Fish	Carnivore	3	0.920819	4	Open
111	Egretta garzetta	Little Egret	Pelecaniformes	Ardeidae	LC	No	151000000	500	250	495	33.0969	5	Non-forest	Invertebrate	Carnivore	3	0.823909	4	Open
112	Egretta sacra	Pacific Reef-egret	Pelecaniformes	Ardeidae	LC	No	88800000	500	250	515	32.8517	1	Low	Carnivore	Carnivore	3	1.52288	2.5	Open
113	Fregata ariel	Lesser Frigatebird	Pelecaniformes	Fregatidae	LC	No	167000000	0	0	750	64.5646	2	Low	Fish	Carnivore	5	1	1	Open
114	Fregata minor	Great Frigatebird	Pelecaniformes	Fregatidae	LC	No	126000000	150	75	1326.25	64.2168	2	Low	Fish	Carnivore	4	1.09691	1	Open
115	Sula leucogaster	Brown Booby	Pelecaniformes	Sulidae	LC	No	223000000	100	50	1137	59.3333	3	Non-forest	Fish	Carnivore	2	1.22185	1.5	Open
116	Sula dactylatra	Masked Booby	Pelecaniformes	Sulidae	LC	No	211000000	100	50	1502.5	62.4099	3	Non-forest	Fish	Carnivore	2	1.22185	1.5	Open
117	Anhinga melanogaster	Oriental Darter	Pelecaniformes	Anhingidae	NT	No	19400000	500	250	1436.5	39.2503	3	Low	Fish	Carnivore	3	1.04576	4	Open
118	Esacus magnirostris	Beach Thick-knee	Charadriiformes	Burhinidae	NT	No	29800000	500	250	1000	42.1785	1	Non-forest	Invertebrate	Carnivore	1	2	1	Open
119	Charadrius dubius	Little Ringed Plover	Charadriiformes	Charadriidae	LC	No	55900000	800	400	39	51.0466	4	Low	Invertebrate	Carnivore	1	1.39794	4	Open
120	Charadrius peronii	Malay Plover	Charadriiformes	Charadriidae	NT	No	8240000	500	250	42	45.0726	2	Non-forest	Invertebrate	Carnivore	1	1.69897	2.5	Open
121	Rostratula benghalensis	Greater Painted-snipe	Charadriiformes	Rostratulidae	LC	No	90900000	1800	900	137	31.5912	3	Non-forest	Invertebrate	Carnivore	3	1.04576	3.5	Open
122	Hydrophasianus chirurgus	Pheasant-tailed Jacana	Charadriiformes	Jacanidae	LC	No	19700000	1000	500	182.5	40.8528	1	Non-forest	Invertebrate	Carnivore	1	2	4	Open
123	Irediparra gallinacea	Comb-crested Jacana	Charadriiformes	Jacanidae	LC	No	12400000	500	250	107.75	32.364	2	Non-forest	Invertebrate	Carnivore	2	1.39794	4	Open
124	Scolopax bukidnonensis	Bukidnon Woodcock	Charadriiformes	Scolopacidae	LC	Yes	377000	1860	1830	251.5	19.577	1	High	Invertebrate	Carnivore	1	2	2	Open
125	Turnix sylvaticus	Common Buttonquail	Charadriiformes	Turnicidae	LC	No	83700000	2400	1200	51.25	27.2216	5	Non-forest	Invertebrate	Carnivore	3	0.823909	4.5	Open
126	Turnix maculosus	Red-backed Buttonquail	Charadriiformes	Turnicidae	LC	No	11000000	1200	600	36.25	27.1829	3	Non-forest	Seed	Herbivore	3	1.04576	3	Open
127	Turnix ocellatus	Spotted Buttonquail	Charadriiformes	Turnicidae	LC	Yes	197000	2200	1100	110	27.4185	6	Non-forest	Plant	Herbivore	2	0.920819	3	Open
128	Turnix suscitator	Barred Buttonquail	Charadriiformes	Turnicidae	LC	No	21900000	300	150	50.5	20.7929	5	Low	Seed	Herbivore	3	0.823909	4	Open
129	Turnix worcesteri	Luzon Buttonquail	Charadriiformes	Turnicidae	DD	Yes	22499	1100	550	63.34	31.5187	1	Non-forest	Omnivore	Herbivore	2	1.69897	NA	Open
130	Anous stolidus	Brown Noddy	Charadriiformes	Laridae	LC	No	215000000	50	25	168.25	62.9824	2	Non-forest	Fish	Carnivore	2	1.39794	1	Open
131	Anous minutus	Black Noddy	Charadriiformes	Laridae	LC	No	164000000	50	25	120.333	61.2093	1	Non-forest	Fish	Carnivore	2	1.69897	1	Open
132	Sternula albifrons	Little Tern	Charadriiformes	Laridae	LC	No	279000000	2000	1000	56	69.8555	5	Non-forest	Carnivore	Carnivore	2	1	2.5	Open
133	Phodilus badius	Oriental Bay-owl	Strigiformes	Tytonidae	LC	No	8300000	1500	750	281.5	20.2566	3	Medium	Vertebrate	Carnivore	2	1.22185	4	Closed
134	Tyto longimembris	Eastern Grass-owl	Strigiformes	Tytonidae	LC	No	41000000	2500	1250	352.5	47.0754	5	Non-forest	Vertebrate	Carnivore	2	1	5.5	Open
135	Ninox scutulata	Brown Boobook	Strigiformes	Strigidae	LC	No	15300000	1200	600	198	29.2601	6	Medium	Invertebrate	Carnivore	2	0.920819	3.5	Closed
136	Ninox randi	Chocolate Boobook	Strigiformes	Strigidae	NT	Yes	643000	1000	500	210	29.2601	2	Medium	Invertebrate	Carnivore	2	1.39794	3.5	Closed
137	Ninox philippensis	Luzon Boobook	Strigiformes	Strigidae	LC	Yes	412000	1000	500	125	27.2154	1	Medium	Invertebrate	Carnivore	2	1.69897	2	Closed
138	Ninox spilocephala	Mindanao Boobook	Strigiformes	Strigidae	NT	Yes	180000	1000	500	107.75	27.2154	2	Medium	Invertebrate	Carnivore	2	1.39794	2	Closed
139	Ninox leventisi	Camiguin Boobook	Strigiformes	Strigidae	EN	Yes	270	1000	500	124	27.2154	1	Medium	No Information	Carnivore	2	1.69897	2	Closed
140	Ninox reyi	Sulu Boobook	Strigiformes	Strigidae	VU	Yes	9100	1000	500	107.75	27.2154	2	Medium	No Information	Carnivore	2	1.39794	2	Closed
141	Ninox rumseyi	Cebu Boobook	Strigiformes	Strigidae	EN	Yes	6600	700	350	125	27.2154	2	Medium	Vertebrate	Carnivore	2	1.39794	2	Closed
142	Ninox spilonotus	Romblon Boobook	Strigiformes	Strigidae	EN	Yes	3500	1000	500	107.75	27.2154	2	Medium	No Information	Carnivore	2	1.39794	2	Closed
143	Ninox mindorensis	Mindoro Boobook	Strigiformes	Strigidae	VU	Yes	12100	1250	625	107.75	27.2154	1	Medium	No Information	Carnivore	2	1.69897	2	Closed
144	Otus rufescens	Reddish Scops-owl	Strigiformes	Strigidae	NT	No	2800000	600	300	77	24.5057	1	Medium	Invertebrate	Carnivore	1	2	NA	Closed
145	Otus gurneyi	Giant Scops-owl	Strigiformes	Strigidae	VU	Yes	253000	1200	600	253	20.5322	1	High	Vertebrate	Carnivore	1	2	NA	Closed
146	Otus megalotis	Luzon Lowland Scops-owl	Strigiformes	Strigidae	LC	Yes	213000	900	750	248.333	21.2958	2	High	Invertebrate	Carnivore	1	1.69897	2.5	Closed
147	Otus nigrorum	Visayan Scops-owl	Strigiformes	Strigidae	VU	Yes	41100	2900	1450	200	24.3626	1	High	Invertebrate	Carnivore	1	2	4	Closed
148	Otus everetti	Mindanao Lowland Scops-owl	Strigiformes	Strigidae	LC	Yes	264000	1550	775	150	24.3626	1	High	Invertebrate	Carnivore	1	2	4	Closed
149	Otus fuliginosus	Palawan Scops-owl	Strigiformes	Strigidae	NT	Yes	20500	500	250	123.28	22.9606	2	Medium	Invertebrate	Carnivore	1	1.69897	NA	Closed
150	Otus longicornis	Luzon Highland Scops-owl	Strigiformes	Strigidae	NT	Yes	114000	1440	1080	82.87	30.7692	2	High	Invertebrate	Carnivore	1	1.69897	2.5	Closed
151	Otus mirus	Mindanao Highland Scops-owl	Strigiformes	Strigidae	NT	Yes	17700	1450	2225	65	30.7692	1	High	Invertebrate	Carnivore	1	2	2.5	Closed
152	Otus mindorensis	Mindoro Scops-owl	Strigiformes	Strigidae	NT	Yes	2300	630	1185	123.28	26.5649	1	High	Invertebrate	Carnivore	1	2	NA	Closed
153	Otus elegans	Ryukyu Scops-owl	Strigiformes	Strigidae	NT	No	404000	550	275	124	34.6612	2	High	Invertebrate	Carnivore	2	1.39794	3.5	Closed
154	Otus mantananensis	Mantanani Scops-owl	Strigiformes	Strigidae	NT	No	283000	1000	500	105	28.8215	3	Medium	Invertebrate	Carnivore	1	1.52288	NA	Closed
155	Strix seloputo	Spotted Wood-owl	Strigiformes	Strigidae	LC	No	5930000	800	400	1011	30.7381	3	Medium	Vertebrate	Carnivore	2	1.22185	2.5	Closed
156	Bubo philippensis	Philippine Eagle-owl	Strigiformes	Strigidae	VU	Yes	631000	650	325	1392.15	23.4137	3	High	Vertebrate	Carnivore	1	1.52288	2	Closed
157	Elanus caeruleus	Black-winged Kite	Accipitriformes	Accipitridae	LC	No	132000000	500	250	259	45.1768	5	Non-forest	Vertebrate	Carnivore	2	1	4	Open
158	Pernis ptilorhynchus	Oriental Honey-buzzard	Accipitriformes	Accipitridae	LC	No	38200000	1800	900	1117.5	31.944	2	Medium	Invertebrate	Carnivore	2	1.39794	2	Open
159	Pernis steerei	Philippine Honey-buzzard	Accipitriformes	Accipitridae	LC	Yes	844000	1310	745	708.5	29.9257	1	High	Invertebrate	Carnivore	3	1.52288	2	Open
160	Aviceda jerdoni	Jerdon's Baza	Accipitriformes	Accipitridae	LC	No	14600000	900	650	353	25.6275	3	Medium	Invertebrate	Carnivore	2	1.22185	2.5	Open
161	Spilornis cheela	Crested Serpent-eagle	Accipitriformes	Accipitridae	LC	No	19100000	1900	950	1266	31.5292	5	Medium	Vertebrate	Carnivore	2	1	1	Open
162	Spilornis holospilus	Philippine Serpent-eagle	Accipitriformes	Accipitridae	LC	Yes	756000	500	250	637.5	30.9739	1	Medium	Vertebrate	Carnivore	1	2	1	Open
163	Pithecophaga jefferyi	Philippine Eagle	Accipitriformes	Accipitridae	CR	Yes	551000	1850	1075	6350	30.3058	2	High	Vertebrate	Carnivore	1	1.69897	1	Open
164	Nisaetus philippensis	North Philippine Hawk-eagle	Accipitriformes	Accipitridae	EN	Yes	233000	1000	500	1224	26.3471	1	High	Vertebrate	Carnivore	1	2	1	Open
165	Nisaetus pinskeri	South Philippine Hawk-eagle	Accipitriformes	Accipitridae	EN	Yes	287000	1900	950	1200	26.3471	1	High	Vertebrate	Carnivore	1	2	1	Open
166	Nisaetus cirrhatus	Changeable Hawk-eagle	Accipitriformes	Accipitridae	LC	No	15300000	1500	750	1350	27.9469	3	Low	Vertebrate	Carnivore	1	1.52288	1	Open
167	Lophotriorchis kienerii	Rufous-bellied Eagle	Accipitriformes	Accipitridae	NT	No	16800000	1000	1000	766.5	35.8703	1	High	Vertebrate	Carnivore	1	2	1	Open
168	Accipiter trivirgatus	Crested Goshawk	Accipitriformes	Accipitridae	LC	No	17200000	1800	900	450	23.2233	1	High	Vertebrate	Carnivore	2	1.69897	2	Open
169	Accipiter virgatus	Besra	Accipitriformes	Accipitridae	LC	No	21200000	2100	1350	113.25	27.5544	3	High	Vertebrate	Carnivore	2	1.22185	3.5	Open
170	Haliaeetus leucogaster	White-bellied Sea-eagle	Accipitriformes	Accipitridae	LC	No	40000000	1700	850	2775	42.1328	5	Non-forest	Vertebrate	Carnivore	3	0.823909	2	Open
171	Icthyophaga ichthyaetus	Grey-headed Fish-eagle	Accipitriformes	Accipitridae	NT	No	16300000	500	250	2150	28.9707	4	Non-forest	Fish	Carnivore	3	0.920819	2	Open
172	Haliastur indus	Brahminy Kite	Accipitriformes	Accipitridae	LC	No	45300000	1800	900	548.25	36.4017	4	Low	Vertebrate	Carnivore	4	0.79588	2.5	Open
173	Harpactes ardens	Philippine Trogon	Trogoniformes	Trogonidae	LC	Yes	655000	1670	835	98	35.703	2	High	Invertebrate	Carnivore	1	1.69897	3	Closed
174	Buceros hydrocorax	Northern Rufous Hornbill	Bucerotiformes	Bucerotidae	VU	Yes	197000	2100	1050	1420.5	18.106	1	High	Unsure	Herbivore	3	1.52288	3	Closed
175	Buceros mindanensis	Southern Rufous Hornbill	Bucerotiformes	Bucerotidae	VU	Yes	248000	2100	1050	1508	18.106	1	High	Fruit	Herbivore	3	1.52288	3	Closed
176	Anthracoceros montani	Sulu Hornbill	Bucerotiformes	Bucerotidae	CR	Yes	780	900	450	715	18.0287	1	High	Fruit	Herbivore	3	1.52288	2	Closed
177	Anthracoceros marchei	Palawan Hornbill	Bucerotiformes	Bucerotidae	VU	Yes	41300	900	450	750	17.143	3	High	Fruit	Herbivore	3	1.04576	2.5	Closed
178	Rhabdotorrhinus leucocephalus	Writhed Hornbill	Bucerotiformes	Bucerotidae	NT	Yes	168000	200	400	1153.5	22.4796	1	High	Fruit	Herbivore	2	1.69897	2	Closed
179	Rhabdotorrhinus waldeni	Rufous-headed Hornbill	Bucerotiformes	Bucerotidae	CR	Yes	31000	900	750	1153.5	20.2332	1	High	Fruit	Herbivore	1	2	2.5	Closed
180	Penelopides panini	Visayan Hornbill	Bucerotiformes	Bucerotidae	EN	Yes	64500	1050	525	423.5	15.8917	1	High	Fruit	Herbivore	2	1.69897	2.5	Closed
181	Penelopides affinis	Mindanao Hornbill	Bucerotiformes	Bucerotidae	LC	Yes	265000	900	450	479.5	15.1438	1	High	Fruit	Herbivore	3	1.52288	3	Closed
182	Penelopides mindorensis	Mindoro Hornbill	Bucerotiformes	Bucerotidae	EN	Yes	11700	1000	500	423.5	16.8592	1	High	Fruit	Herbivore	2	1.69897	NA	Closed
183	Penelopides manillae	Luzon Hornbill	Bucerotiformes	Bucerotidae	LC	Yes	214000	900	450	454.75	15.894	3	High	Fruit	Herbivore	3	1.04576	4.5	Closed
184	Merops americanus	Rufous-crowned Bee-eater	Coraciiformes	Meropidae	LC	Yes	701000	670	335	36	19.8009	2	Low	Invertebrate	Carnivore	1	1.69897	4	Closed
185	Merops philippinus	Blue-tailed Bee-eater	Coraciiformes	Meropidae	LC	No	22800000	0	0	36	20.3169	5	Low	Invertebrate	Carnivore	1	1.30103	6	Closed
186	Eurystomus orientalis	Oriental Dollarbird	Coraciiformes	Coraciidae	LC	No	53500000	800	400	146.75	36.9519	6	Medium	Invertebrate	Carnivore	2	0.920819	4	Closed
187	Ceyx melanurus	North Philippine Dwarf-kingfisher	Coraciiformes	Alcedinidae	VU	Yes	318000	750	375	16.4	21.5231	2	High	Invertebrate	Carnivore	2	1.39794	NA	Closed
188	Ceyx mindanensis	South Philippine Dwarf-Kingfisher	Coraciiformes	Alcedinidae	VU	Yes	166000	750	375	23	21.5231	2	High	Invertebrate	Carnivore	2	1.39794	NA	Closed
189	Ceyx erithaca	Oriental Dwarf-kingfisher	Coraciiformes	Alcedinidae	LC	No	14600000	1300	650	16.375	14.0733	6	Medium	Invertebrate	Carnivore	3	0.744727	5	Closed
190	Ceyx margarethae	Dimorphic Dwarf-kingfisher	Coraciiformes	Alcedinidae	LC	Yes	427000	1000	500	19.35	21.4723	1	Medium	Invertebrate	Carnivore	2	1.69897	2	Closed
191	Ceyx cyanopectus	Northern Indigo-banded Kingfisher	Coraciiformes	Alcedinidae	LC	Yes	266000	1500	750	16.5	24.6793	4	Medium	Fish	Carnivore	2	1.09691	NA	Closed
192	Ceyx nigrirostris	Southern Indigo-banded Kingfisher	Coraciiformes	Alcedinidae	NT	Yes	52200	1500	750	16.5	24.6793	2	Medium	Carnivore	Carnivore	2	1.39794	NA	Closed
193	Ceyx flumenicola	Northern Silvery Kingfisher	Coraciiformes	Alcedinidae	NT	Yes	49900	750	375	17.6	21.5119	3	High	Carnivore	Carnivore	2	1.22185	NA	Closed
194	Ceyx argentatus	Southern Silvery Kingfisher	Coraciiformes	Alcedinidae	NT	Yes	180000	1000	500	21.3	21.5119	1	High	Unsure	Carnivore	2	1.69897	NA	Closed
195	Alcedo meninting	Blue-eared Kingfisher	Coraciiformes	Alcedinidae	LC	No	14400000	1000	500	19.5	25.242	5	Low	Fish	Carnivore	2	1	5	Closed
196	Pelargopsis capensis	Stork-billed Kingfisher	Coraciiformes	Alcedinidae	LC	No	16800000	870	435	182.5	18.7576	6	Medium	Fish	Carnivore	3	0.744727	3.5	Closed
197	Halcyon coromanda	Ruddy Kingfisher	Coraciiformes	Alcedinidae	LC	No	22100000	1800	900	76.25	23.5537	6	Medium	Carnivore	Carnivore	3	0.744727	5	Closed
198	Halcyon gularis	White-throated Kingfisher	Coraciiformes	Alcedinidae	LC	Yes	703000	1000	500	90.75	20.246	2	Low	Carnivore	Carnivore	3	1.22185	3	Closed
199	Actenoides lindsayi	Spotted Kingfisher	Coraciiformes	Alcedinidae	LC	Yes	314000	1200	600	98.25	20.1153	3	High	Invertebrate	Carnivore	2	1.22185	2	Closed
200	Actenoides hombroni	Blue-capped Kingfisher	Coraciiformes	Alcedinidae	VU	Yes	140000	2300	1250	121.25	22.5231	1	High	Invertebrate	Carnivore	3	1.52288	2	Closed
201	Todiramphus winchelli	Rufous-lored Kingfisher	Coraciiformes	Alcedinidae	VU	Yes	458000	750	375	67.75	24.3504	1	High	Invertebrate	Carnivore	1	2	3	Closed
202	Todiramphus chloris	Collared Kingfisher	Coraciiformes	Alcedinidae	LC	No	47800000	1500	750	73.75	23.7706	7	Medium	Invertebrate	Carnivore	3	0.677781	3.5	Closed
203	Psilopogon haemacephalus	Coppersmith Barbet	Piciformes	Megalaimidae	LC	No	17600000	1500	750	41.3	25.0826	5	Medium	Fruit	Carnivore	2	1	3	Closed
204	Chrysocolaptes erythrocephalus	Red-headed Flameback	Piciformes	Picidae	EN	Yes	47800	2100	1050	142	19.8708	3	Medium	Invertebrate	Carnivore	2	1.22185	3.5	Closed
205	Chrysocolaptes haematribon	Luzon Flameback	Piciformes	Picidae	LC	Yes	213000	1000	500	127.5	19.8708	2	Medium	Invertebrate	Carnivore	2	1.39794	3.5	Closed
206	Chrysocolaptes lucidus	Buff-spotted Flameback	Piciformes	Picidae	LC	Yes	264000	1500	750	127	19.8708	5	Medium	Invertebrate	Carnivore	2	1	3.5	Closed
207	Chrysocolaptes xanthocephalus	Yellow-faced Flameback	Piciformes	Picidae	EN	Yes	65200	900	450	142	19.8708	2	Medium	Invertebrate	Carnivore	2	1.39794	3.5	Closed
208	Dinopium everetti	Spot-throated Flameback	Piciformes	Picidae	NT	Yes	41300	1700	850	91.5	20.9547	3	Medium	Invertebrate	Carnivore	1	1.52288	2.5	Closed
209	Mulleripicus funebris	Northern Sooty Woodpecker	Piciformes	Picidae	NT	Yes	215000	1600	800	161	20.2182	1	High	Invertebrate	Carnivore	1	2	3	Closed
210	Mulleripicus fuliginosus	Southern Sooty Woodpecker	Piciformes	Picidae	VU	Yes	253000	500	250	164	20.2182	2	High	Invertebrate	Carnivore	1	1.69897	2.5	Closed
211	Mulleripicus pulverulentus	Great Slaty Woodpecker	Piciformes	Picidae	VU	No	9650000	1100	550	461.5	24.5109	3	High	Invertebrate	Carnivore	2	1.22185	3	Closed
212	Dryocopus javensis	White-bellied Woodpecker	Piciformes	Picidae	LC	No	19400000	3600	1800	272	21.2054	5	High	Invertebrate	Carnivore	2	1	3	Closed
213	Picoides maculatus	Philippine Pygmy Woodpecker	Piciformes	Picidae	LC	Yes	661000	850	925	26	24.9446	5	Medium	Invertebrate	Carnivore	1	1.30103	NA	Closed
214	Picoides ramsayi	Sulu Pygmy Woodpecker	Piciformes	Picidae	VU	Yes	9100	550	275	20.9	27.8162	3	Medium	Invertebrate	Carnivore	3	1.04576	NA	Closed
215	Microhierax erythrogenys	Philippine Falconet	Falconiformes	Falconidae	LC	Yes	655000	900	750	45.3333	38.495	1	Medium	Invertebrate	Carnivore	2	1.69897	3.5	Open
216	Falco severus	Oriental Hobby	Falconiformes	Falconidae	LC	No	20300000	2500	1250	202.75	58.6028	3	Medium	Vertebrate	Carnivore	2	1.22185	3.5	Open
217	Falco peregrinus	Peregrine Falcon	Falconiformes	Falconidae	LC	No	413000000	4000	2000	1003	55.4224	6	Low	Vertebrate	Carnivore	1	1.22185	3.5	Open
218	Cacatua haematuropygia	Philippine Cockatoo	Psittaciformes	Cacatuidae	CR	Yes	734000	150	75	300	34.6035	3	Medium	Seed	Herbivore	3	1.04576	2.5	Closed
219	Trichoglossus johnstoniae	Mindanao Lorikeet	Psittaciformes	Psittacidae	NT	Yes	8700	1500	1750	55	43.3162	1	High	Nectar	Herbivore	1	2	2	Closed
220	Bolbopsittacus lunulatus	Guaiabero	Psittaciformes	Psittacidae	LC	Yes	631000	1000	500	69.5	38.9329	3	Medium	Fruit	Herbivore	2	1.22185	NA	Closed
221	Loriculus philippensis	Philippine Hanging-parrot	Psittaciformes	Psittacidae	LC	Yes	852000	1250	625	35.5	38.4882	4	Low	Nectar	Herbivore	3	0.920819	3	Closed
222	Prioniturus waterstradti	Mindanao Racquet-tail	Psittaciformes	Psittacidae	NT	Yes	72600	1880	1760	122	42.6367	1	High	Fruit	Herbivore	2	1.69897	NA	Closed
223	Prioniturus montanus	Montane Racquet-tail	Psittaciformes	Psittacidae	NT	Yes	10400	2200	1800	122	40.481	1	High	Fruit	Herbivore	2	1.69897	NA	Closed
224	Prioniturus platenae	Blue-headed Racquet-tail	Psittaciformes	Psittacidae	VU	Yes	47800	300	150	122	47.9443	2	Medium	Seed	Herbivore	2	1.39794	NA	Closed
225	Prioniturus mindorensis	Mindoro Racquet-tail	Psittaciformes	Psittacidae	VU	Yes	12100	1670	835	122	39.7774	1	Medium	Fruit	Herbivore	2	1.69897	3	Closed
226	Prioniturus verticalis	Sulu Racquet-tail	Psittaciformes	Psittacidae	CR	Yes	930	1000	500	122	40.8545	2	High	Fruit	Herbivore	2	1.39794	NA	Closed
227	Prioniturus luconensis	Green Racquet-tail	Psittaciformes	Psittacidae	EN	Yes	147000	400	500	108	42.2763	2	Medium	Fruit	Herbivore	3	1.22185	NA	Closed
228	Prioniturus discurus	Blue-crowned Racquet-tail	Psittaciformes	Psittacidae	LC	Yes	474000	1500	750	131	39.7774	3	Medium	Fruit	Herbivore	1	1.52288	3	Closed
229	Tanygnathus lucionensis	Blue-naped Parrot	Psittaciformes	Psittacidae	NT	No	1370000	1000	500	189.5	44.2087	3	Medium	Fruit	Herbivore	2	1.22185	2	Closed
230	Tanygnathus everetti	Blue-backed Parrot	Psittaciformes	Psittacidae	EN	No	220000	500	250	253.5	40.238	3	Medium	Fruit	Herbivore	2	1.22185	2	Closed
231	Erythropitta erythrogaster	Philippine Pitta	Passeriformes	Pittidae	LC	Yes	1010000	1200	600	57.75	23.0882	5	Medium	Invertebrate	Carnivore	3	0.823909	3	Closed
232	Erythropitta kochi	Whiskered Pitta	Passeriformes	Pittidae	NT	Yes	176000	1140	930	114.5	18.0006	2	Medium	Invertebrate	Carnivore	1	1.69897	2	Closed
233	Pitta sordida	Western Hooded Pitta	Passeriformes	Pittidae	LC	No	12300000	1000	500	57	17.9272	7	Medium	Invertebrate	Carnivore	1	1.1549	3.5	Closed
234	Pitta steerii	Azure-breasted Pitta	Passeriformes	Pittidae	VU	Yes	252000	1000	500	92	15.4663	3	High	Invertebrate	Carnivore	1	1.52288	3	Closed
235	Sarcophanops samarensis	Visayan Wattled Broadbill	Passeriformes	Eurylaimidae	VU	Yes	49900	500	350	37.5	20.7294	1	High	Invertebrate	Carnivore	1	2	1	Closed
236	Sarcophanops steerii	Mindanao Wattled Broadbill	Passeriformes	Eurylaimidae	VU	Yes	180000	800	400	39.8667	21.8993	4	Medium	Invertebrate	Carnivore	1	1.39794	1	Closed
237	Gerygone sulphurea	Golden-bellied Gerygone	Passeriformes	Acanthizidae	LC	No	8090000	1500	750	5.6	17.4649	5	Medium	Invertebrate	Carnivore	1	1.30103	2.5	Closed
238	Oriolus xanthonotus	Dark-throated Oriole	Passeriformes	Oriolidae	NT	No	5220000	300	150	45	25.1639	1	High	Fruit	Herbivore	2	1.69897	2	Open
239	Oriolus steerii	Philippine Oriole	Passeriformes	Oriolidae	LC	Yes	401000	1200	600	70.91	23.791	2	Medium	Fruit	Herbivore	2	1.39794	2	Open
240	Oriolus albiloris	White-lored Oriole	Passeriformes	Oriolidae	LC	Yes	85100	1200	600	70.91	25.7769	1	Medium	Fruit	Herbivore	2	1.69897	2	Open
241	Oriolus isabellae	Isabela Oriole	Passeriformes	Oriolidae	CR	Yes	8900	390	245	46	18.0595	1	High	Fruit	Herbivore	1	2	2	Open
242	Oriolus chinensis	Black-naped Oriole	Passeriformes	Oriolidae	LC	No	21100000	1600	800	82	22.5082	5	Medium	Fruit	Herbivore	2	1	3	Open
243	Pachycephala philippinensis	Yellow-bellied Whistler	Passeriformes	Pachycephalidae	LC	Yes	661000	1000	500	22.3	15.1776	1	High	Invertebrate	Carnivore	2	1.69897	2.5	Open
244	Pachycephala cinerea	Mangrove Whistler	Passeriformes	Pachycephalidae	LC	No	7600000	1830	915	21.6667	15.2597	3	Medium	Invertebrate	Carnivore	1	1.52288	2	Open
245	Pachycephala albiventris	Green-backed Whistler	Passeriformes	Pachycephalidae	LC	Yes	233000	700	650	21	13.0077	1	High	Invertebrate	Carnivore	2	1.69897	2	Open
246	Pachycephala homeyeri	White-vented Whistler	Passeriformes	Pachycephalidae	LC	No	653000	2000	1000	25.82	13.1263	1	High	Invertebrate	Carnivore	2	1.69897	2	Open
247	Pericrocotus igneus	Fiery Minivet	Passeriformes	Campephagidae	NT	No	4500000	610	305	15	25.7295	1	Medium	Invertebrate	Carnivore	2	1.69897	2	Open
248	Pericrocotus flammeus	Scarlet Minivet	Passeriformes	Campephagidae	LC	No	19300000	2700	1350	27.125	27.3376	1	Medium	Invertebrate	Carnivore	1	2	2.5	Open
249	Coracina striata	Bar-bellied Cuckooshrike	Passeriformes	Campephagidae	LC	No	6440000	2000	1000	112.333	31.0342	4	Medium	Invertebrate	Carnivore	2	1.09691	2	Open
250	Coracina panayensis	Visayan Cuckooshrike	Passeriformes	Campephagidae	LC	Yes	65200	2000	1000	111	31.0342	1	Medium	Invertebrate	Carnivore	2	1.69897	2	Open
251	Malindangia mcgregori	McGregor's Cuckooshrike	Passeriformes	Campephagidae	LC	Yes	81500	500	1250	43.0333	20.8122	1	High	Invertebrate	Carnivore	2	1.69897	NA	Open
252	Edolisoma ostentum	White-winged Cicadabird	Passeriformes	Campephagidae	VU	Yes	41100	1200	600	83.5	24.4321	1	High	Invertebrate	Carnivore	1	2	2.5	Open
253	Edolisoma coerulescens	Blackish Cicadabird	Passeriformes	Campephagidae	LC	Yes	214000	1000	500	43	20.4172	1	Medium	Invertebrate	Carnivore	2	1.69897	NA	Open
254	Edolisoma mindanense	Black-bibbed Cicadabird	Passeriformes	Campephagidae	VU	Yes	831000	1000	500	59	22.5787	2	Medium	Invertebrate	Carnivore	2	1.39794	NA	Open
255	Lalage melanoleuca	Northern Black-and-white Triller	Passeriformes	Campephagidae	LC	Yes	237000	1000	500	45.5333	25.2775	1	High	Invertebrate	Carnivore	2	1.69897	2	Open
256	Lalage minor	Southern Black-and-white Triller	Passeriformes	Campephagidae	LC	Yes	252000	600	300	45.25	25.2775	1	High	Invertebrate	Carnivore	2	1.69897	2	Open
257	Lalage nigra	Pied Triller	Passeriformes	Campephagidae	LC	No	7010000	1000	500	26.4667	24.4099	3	Medium	Invertebrate	Carnivore	2	1.22185	2.5	Open
258	Artamus leucoryn	White-breasted Woodswallow	Passeriformes	Artamidae	LC	No	30100000	650	325	49.6	40.0364	6	Low	Invertebrate	Carnivore	1	1.22185	3.5	Open
259	Aegithina tiphia	Common Iora	Passeriformes	Aegithinidae	LC	No	14900000	1500	750	14.25	9.44263	6	Medium	Invertebrate	Carnivore	1	1.22185	3	Open
260	Rhipidura nigrocinnamomea	Black-and-cinnamon Fantail	Passeriformes	Rhipiduridae	LC	Yes	80300	1270	1635	12.6667	18.6683	1	High	Invertebrate	Carnivore	1	2	3	Open
261	Rhipidura cyaniceps	Blue-headed Fantail	Passeriformes	Rhipiduridae	LC	Yes	212000	1000	500	13.8	17.734	1	Medium	Invertebrate	Carnivore	1	2	2	Open
262	Rhipidura sauli	Tablas Fantail	Passeriformes	Rhipiduridae	VU	Yes	950	500	250	14	17.734	1	Medium	Invertebrate	Carnivore	1	2	2	Open
263	Rhipidura albiventris	Visayan Fantail	Passeriformes	Rhipiduridae	LC	Yes	65200	500	250	14	17.734	1	Medium	Invertebrate	Carnivore	1	2	2	Open
264	Rhipidura samarensis	Visayan Blue Fantail	Passeriformes	Rhipiduridae	LC	Yes	52200	1200	600	12.6	19.5816	1	High	Invertebrate	Carnivore	1	2	3	Open
265	Rhipidura superciliaris	Mindanao Blue Fantail	Passeriformes	Rhipiduridae	LC	Yes	171000	1200	600	12.6667	19.5816	1	High	Invertebrate	Carnivore	1	2	3	Open
266	Rhipidura nigritorquis	Philippine Pied Fantail	Passeriformes	Rhipiduridae	LC	Yes	1020000	800	400	16.4	16.3014	6	Medium	Invertebrate	Carnivore	1	1.22185	2.5	Open
267	Dicrurus leucophaeus	Ashy Drongo	Passeriformes	Dicruridae	LC	No	21200000	3000	1500	37.6	30.1093	3	Low	Invertebrate	Carnivore	3	1.04576	3	Open
268	Dicrurus balicassius	Balicassiao	Passeriformes	Dicruridae	LC	Yes	338000	1200	600	72.29	19.3438	1	High	Invertebrate	Carnivore	1	2	3	Open
269	Dicrurus hottentottus	Hair-crested Drongo	Passeriformes	Dicruridae	LC	No	22300000	2440	1220	79.19	24.4694	3	Medium	Invertebrate	Carnivore	2	1.22185	4	Open
270	Dicrurus striatus	Short-tailed Drongo	Passeriformes	Dicruridae	LC	Yes	264000	1500	750	1	#N/A	2	Medium	Invertebrate	Carnivore	2	1.39794	3	Open
271	Dicrurus menagei	Tablas Drongo	Passeriformes	Dicruridae	EN	Yes	950	585	292.5	51.7	23.3547	2	High	Invertebrate	Carnivore	1	1.69897	3	Open
272	Hypothymis azurea	Black-naped Monarch	Passeriformes	Monarchidae	LC	No	19800000	1500	750	11.1333	15.9888	6	Medium	Invertebrate	Carnivore	1	1.22185	3	Open
273	Hypothymis helenae	Short-crested Monarch	Passeriformes	Monarchidae	NT	Yes	425000	1000	500	9.8	18.3997	1	High	Invertebrate	Carnivore	1	2	NA	Open
274	Hypothymis coelestis	Celestial Monarch	Passeriformes	Monarchidae	VU	Yes	828000	650	425	13.6	19.3662	2	Medium	Invertebrate	Carnivore	1	1.69897	NA	Open
275	Terpsiphone unirufa	Northern Rufous Paradise-flycatcher	Passeriformes	Monarchidae	LC	Yes	343000	1200	600	22.5	18.1186	1	Medium	Invertebrate	Carnivore	1	2	3	Open
276	Terpsiphone cinnamomea	Southern Rufous Paradise-flycatcher	Passeriformes	Monarchidae	LC	Yes	437000	1200	600	21.525	18.1186	5	Medium	Invertebrate	Carnivore	1	1.30103	3	Open
277	Terpsiphone cyanescens	Blue Paradise-flycatcher	Passeriformes	Monarchidae	LC	Yes	40900	1000	500	24.64	17.6713	2	Medium	Invertebrate	Carnivore	1	1.69897	2	Open
278	Lanius schach	Long-tailed Shrike	Passeriformes	Laniidae	LC	No	33000000	4300	2150	53.75	19.9996	7	Low	Invertebrate	Carnivore	2	0.853872	5	Open
279	Lanius validirostris	Mountain Shrike	Passeriformes	Laniidae	NT	Yes	277000	1250	1625	38	17.0848	2	Medium	Invertebrate	Carnivore	1	1.69897	NA	Open
280	Corvus enca	Slender-billed Crow	Passeriformes	Corvidae	LC	No	7200000	1000	500	238	33.0061	5	Medium	Omnivore	Carnivore	4	0.69897	2.5	Open
281	Corvus macrorhynchos	Large-billed Crow	Passeriformes	Corvidae	LC	No	39100000	5000	2500	560.667	38.0385	7	Medium	Omnivore	Carnivore	1	1.1549	4.5	Open
282	Culicicapa helianthea	Citrine Canary-flycatcher	Passeriformes	Stenostiridae	LC	No	2060000	2500	1250	8.2	13.6007	3	Medium	Invertebrate	Carnivore	1	1.52288	NA	Open
283	Pardaliparus elegans	Elegant Tit	Passeriformes	Paridae	LC	Yes	844000	2470	1235	13.2	14.2037	3	Medium	Invertebrate	Carnivore	3	1.04576	NA	Open
284	Pardaliparus amabilis	Palawan Tit	Passeriformes	Paridae	NT	Yes	49900	2085	1042.5	12.68	17.7332	3	Medium	Invertebrate	Carnivore	3	1.04576	NA	Open
285	Sittiparus semilarvatus	White-fronted Tit	Passeriformes	Paridae	NT	Yes	475000	800	750	18	21.1731	2	Medium	Invertebrate	Carnivore	3	1.22185	NA	Open
286	Mirafra javanica	Horsfield's Bushlark	Passeriformes	Alaudidae	LC	No	73900000	1000	500	23	20.2426	2	Non-forest	Seed	Herbivore	2	1.39794	3	Closed
287	Alauda gulgula	Oriental Skylark	Passeriformes	Alaudidae	LC	No	24000000	1000	500	27	27.2106	7	Non-forest	Omnivore		2	0.853872	3	Open
288	Micromacronus leytensis	Visayan Miniature Babbler	Passeriformes	Cisticolidae	DD	Yes	20798	800	900	6	15.3588	1	High	Invertebrate	Carnivore	1	2	NA	NA
289	Micromacronus sordidus	Mindanao Miniature Babbler	Passeriformes	Cisticolidae	NT	Yes	60100	1070	1135	5.5	8.96552	1	High	Invertebrate	Carnivore	2	1.69897	NA	NA
290	Cisticola juncidis	Zitting Cisticola	Passeriformes	Cisticolidae	LC	No	134000000	2100	1050	8	13.1298	4	Non-forest	Invertebrate	Carnivore	2	1.09691	4.5	Closed
291	Cisticola exilis	Golden-headed Cisticola	Passeriformes	Cisticolidae	LC	No	36800000	2100	1050	7.75	16.4124	7	Non-forest	Invertebrate	Carnivore	2	0.853872	4	Open
292	Orthotomus frontalis	Rufous-fronted Tailorbird	Passeriformes	Cisticolidae	LC	Yes	271000	2900	1450	7	6.95408	2	Medium	Invertebrate	Carnivore	1	1.69897	2.5	Closed
293	Orthotomus sericeus	Rufous-tailed Tailorbird	Passeriformes	Cisticolidae	LC	No	4430000	400	200	8.9	7.79502	4	Medium	Invertebrate	Carnivore	1	1.39794	2.5	Closed
294	Orthotomus ruficeps	Ashy Tailorbird	Passeriformes	Cisticolidae	LC	No	4670000	1000	500	7	11.976	4	Medium	Invertebrate	Carnivore	1	1.39794	2.5	Open
295	Orthotomus chloronotus	Green-backed Tailorbird	Passeriformes	Cisticolidae	LC	Yes	120000	1060	530	10.6	10.4538	3	Medium	Invertebrate	Carnivore	1	1.52288	2.5	Closed
296	Orthotomus castaneiceps	Chestnut-crowned Tailorbird	Passeriformes	Cisticolidae	LC	Yes	70900	2900	1450	7	9.60508	2	Medium	Invertebrate	Carnivore	1	1.69897	2.5	Closed
297	Orthotomus samarensis	Yellow-breasted Tailorbird	Passeriformes	Cisticolidae	NT	Yes	53200	750	375	8.16667	7.40496	2	High	Invertebrate	Carnivore	1	1.69897	2.5	NA
298	Orthotomus nigriceps	Black-headed Tailorbird	Passeriformes	Cisticolidae	LC	Yes	37700	1000	500	7	8.34549	1	High	Invertebrate	Carnivore	1	2	2.5	NA
299	Orthotomus cinereiceps	White-eared Tailorbird	Passeriformes	Cisticolidae	LC	Yes	38200	1000	500	8	6.16703	2	Medium	Invertebrate	Carnivore	1	1.69897	2.5	NA
300	Orthotomus derbianus	Grey-backed Tailorbird	Passeriformes	Cisticolidae	LC	Yes	125000	750	375	7	8.12612	2	Medium	Invertebrate	Carnivore	1	1.69897	2.5	NA
301	Acrocephalus australis	Australasian Reed-warbler	Passeriformes	Acrocephalidae	LC	No	24600000	2300	1150	17.7	22.8681	4	Non-forest	Invertebrate	Carnivore	1	1.39794	3.11	Open
302	Locustella caudata	Long-tailed Grasshopper-warbler	Passeriformes	Locustellidae	LC	Yes	261000	2050	1725	18	8.64973	2	High	Invertebrate	Carnivore	1	1.69897	3	Open
303	Locustella seebohmi	Benguet Grasshopper-warbler	Passeriformes	Locustellidae	LC	Yes	11100	1350	1525	12	15.2403	2	Non-forest	Invertebrate	Carnivore	1	1.69897	3	Open
304	Megalurus palustris	Striated Grassbird	Passeriformes	Locustellidae	LC	No	14800000	1600	800	42.1	17.7552	4	Non-forest	Invertebrate	Carnivore	1	1.39794	3.5	Closed
305	Cincloramphus timoriensis	Tawny Grassbird	Passeriformes	Locustellidae	LC	No	10700000	4000	2000	32.225	14.0848	3	Non-forest	Invertebrate	Carnivore	2	1.22185	2.5	Open
306	Robsonius rabori	Cordillera Ground-warbler	Passeriformes	Locustellidae	VU	Yes	8500	800	400	61	5.8427	2	High	Invertebrate	Carnivore	1	1.69897	2	Closed
307	Robsonius thompsoni	Sierra Madre Ground-warbler	Passeriformes	Locustellidae	LC	Yes	33100	1300	650	58.75	5.8427	1	High	Invertebrate	Carnivore	1	2	2	Closed
308	Robsonius sorsogonensis	Bicol Ground-warbler	Passeriformes	Locustellidae	NT	Yes	47000	1000	500	61	7.28022	2	High	Invertebrate	Carnivore	1	1.69897	2	Closed
309	Riparia chinensis	Asian Plain Martin	Passeriformes	Hirundinidae	LC	No	11500000	1500	750	1	48.0138	5	Non-forest	Invertebrate	Carnivore	1	1.30103	3	Closed
310	Hirundo javanica	House Swallow	Passeriformes	Hirundinidae	LC	No	32000000	2700	1350	13.25	54.4109	4	Low	Invertebrate	Carnivore	1	1.39794	3	Open
311	Cecropis daurica	Red-rumped Swallow	Passeriformes	Hirundinidae	LC	No	99900000	3500	1750	23.075	52.5432	6	Low	Invertebrate	Carnivore	1	1.22185	4.5	Closed
312	Alophoixus frater	Palawan Bulbul	Passeriformes	Pycnonotidae	LC	Yes	48300	1000	500	44.75	19.3922	1	Medium	Fruit	Herbivore	2	1.69897	2	Open
313	Iole palawanensis	Sulphur-bellied Bulbul	Passeriformes	Pycnonotidae	LC	Yes	23300	1500	1250	27	15.7717	2	High	Fruit	Herbivore	2	1.39794	2.5	Open
314	Hypsipetes amaurotis	Brown-eared Bulbul	Passeriformes	Pycnonotidae	LC	No	4290000	900	1150	33	21.3099	2	Medium	Fruit	Herbivore	4	1.09691	4	Open
315	Hypsipetes siquijorensis	Streak-breasted Bulbul	Passeriformes	Pycnonotidae	EN	Yes	40100	1000	500	59.3	13.7453	2	Medium	Fruit	Herbivore	3	1.22185	2.5	Open
316	Hypsipetes philippinus	Philippine Bulbul	Passeriformes	Pycnonotidae	LC	Yes	563000	2000	1000	33.5	13.0799	3	Medium	Fruit	Herbivore	1	1.52288	2.5	Open
317	Hypsipetes rufigularis	Zamboanga Bulbul	Passeriformes	Pycnonotidae	NT	Yes	50200	1000	500	59.3333	13.7453	1	High	Fruit	Herbivore	1	2	2.5	Open
318	Hypsipetes everetti	Yellowish Bulbul	Passeriformes	Pycnonotidae	LC	Yes	203000	1000	500	58.25	14.6943	2	Medium	Fruit	Herbivore	1	1.69897	2.5	Open
319	Hypsipetes catarmanensis	Camiguin Bulbul	Passeriformes	Pycnonotidae	NT	Yes	270	1550	925	58	14.6943	1	Medium	Fruit	Herbivore	3	1.52288	2.5	Open
320	Hypsipetes haynaldi	Sulu Bulbul	Passeriformes	Pycnonotidae	NT	Yes	8400	1000	500	58	14.6943	1	Medium	Fruit	Herbivore	3	1.52288	2.5	Open
321	Pycnonotus goiavier	Yellow-vented Bulbul	Passeriformes	Pycnonotidae	LC	No	8070000	1830	915	29.6	14.4733	5	Low	Fruit	Herbivore	7	0.455932	3	Open
322	Pycnonotus plumosus	Olive-winged Bulbul	Passeriformes	Pycnonotidae	LC	No	4570000	910	455	30	11.0708	6	Low	Fruit	Herbivore	2	0.920819	2	Open
323	Pycnonotus cinereifrons	Ashy-fronted Bulbul	Passeriformes	Pycnonotidae	LC	Yes	41300	500	250	34.2	11.0708	2	Low	Fruit	Herbivore	2	1.39794	2	Open
324	Brachypodius atriceps	Black-headed Bulbul	Passeriformes	Pycnonotidae	LC	No	8120000	900	450	25	18.1351	3	Medium	Fruit	Herbivore	2	1.22185	2	Open
325	Poliolophus urostictus	Yellow-wattled Bulbul	Passeriformes	Pycnonotidae	LC	Yes	655000	1000	500	24.25	15.498	3	Medium	Fruit	Herbivore	1	1.52288	3	Open
326	Phylloscopus cebuensis	Lemon-throated Leaf-warbler	Passeriformes	Phylloscopidae	LC	Yes	303000	1800	900	9	15.4698	1	High	Invertebrate	Carnivore	1	2	3.5	Closed
327	Phylloscopus olivaceus	Philippine Leaf-warbler	Passeriformes	Phylloscopidae	LC	Yes	380000	1500	750	10.1	12.9558	1	High	Invertebrate	Carnivore	1	2	3.5	Closed
328	Phylloscopus montis	Yellow-breasted Warbler	Passeriformes	Phylloscopidae	LC	No	4640000	1300	1550	5.7	18.1415	1	High	Invertebrate	Carnivore	1	2	2	Closed
329	Phylloscopus trivirgatus	Mountain Warbler	Passeriformes	Phylloscopidae	LC	No	6420000	2540	1730	9	15.9627	3	High	Invertebrate	Carnivore	1	1.52288	2.5	Closed
330	Phyllergates cucullatus	Mountain Tailorbird	Passeriformes	Scotocercidae	LC	No	12100000	750	1575	6.5	13.0624	7	Medium	Invertebrate	Carnivore	1	1.1549	3.5	NA
331	Phyllergates heterolaemus	Rufous-headed Tailorbird	Passeriformes	Scotocercidae	LC	Yes	39500	2100	1850	6.5	4.44444	2	Medium	Invertebrate	Carnivore	1	1.69897	3.5	NA
332	Horornis flavolivaceus	Aberrant Bush-warbler	Passeriformes	Scotocercidae	LC	No	14000000	4200	2800	7.76667	13.3685	3	Low	Invertebrate	Carnivore	1	1.52288	3.5	Closed
333	Horornis seebohmi	Philippine Bush-warbler	Passeriformes	Scotocercidae	LC	Yes	23400	1700	1650	14.875	14.332	2	Medium	Invertebrate	Carnivore	1	1.69897	NA	Closed
334	Dasycrotapha speciosa	Flame-templed Babbler	Passeriformes	Zosteropidae	EN	Yes	41100	925	537.5	16.43	14.8656	1	High	Invertebrate	Carnivore	1	2	NA	Open
335	Dasycrotapha pygmaea	Visayan Pygmy Babbler	Passeriformes	Zosteropidae	NT	Yes	20600	1000	600	8.7	10.2041	3	High	Invertebrate	Carnivore	2	1.22185	NA	Open
336	Dasycrotapha plateni	Mindanao Pygmy Babbler	Passeriformes	Zosteropidae	NT	Yes	96800	900	550	8.7	14.7837	2	High	Invertebrate	Carnivore	2	1.39794	NA	Open
337	Sterrhoptilus capitalis	Rusty-crowned Babbler	Passeriformes	Zosteropidae	LC	Yes	158000	1050	525	14.5	17.5771	1	High	Invertebrate	Carnivore	1	2	3	Open
338	Sterrhoptilus nigrocapitatus	Black-crowned Babbler	Passeriformes	Zosteropidae	LC	Yes	174000	1000	500	14.1	17.6693	1	High	Invertebrate	Carnivore	1	2	3	Open
339	Sterrhoptilus dennistouni	Golden-crowned Babbler	Passeriformes	Zosteropidae	NT	Yes	50200	1150	575	16	15.794	1	Medium	Invertebrate	Carnivore	1	2	3	Open
340	Zosterornis hypogrammicus	Palawan Striped Babbler	Passeriformes	Zosteropidae	NT	Yes	1100	1030	1515	9	17.5749	1	High	Invertebrate	Carnivore	1	2	2	Open
341	Zosterornis striatus	Luzon Striped Babbler	Passeriformes	Zosteropidae	NT	Yes	58000	885	557.5	14	15.2139	2	Medium	Invertebrate	Carnivore	1	1.69897	2	Open
342	Zosterornis latistriatus	Panay Striped Babbler	Passeriformes	Zosteropidae	NT	Yes	430	900	1450	9	12.5373	1	High	Invertebrate	Carnivore	2	1.69897	2	Open
343	Zosterornis nigrorum	Negros Striped Babbler	Passeriformes	Zosteropidae	EN	Yes	2600	650	1275	9	16.1379	1	High	Invertebrate	Carnivore	2	1.69897	2	Open
344	Zosterornis whiteheadi	Chestnut-faced Babbler	Passeriformes	Zosteropidae	LC	Yes	138000	200	900	9	16.3096	2	Medium	Invertebrate	Carnivore	2	1.39794	2	Open
345	Heleia goodfellowi	Mindanao White-eye	Passeriformes	Zosteropidae	LC	Yes	77500	1650	2075	20	20.6744	1	High	Invertebrate	Carnivore	1	2	NA	Open
346	Zosterops nigrorum	Yellowish White-eye	Passeriformes	Zosteropidae	LC	Yes	404000	1000	500	7	17.0198	1	Medium	Invertebrate	Carnivore	2	1.69897	3	Open
347	Zosterops everetti	Everett's White-eye	Passeriformes	Zosteropidae	LC	No	533000	2010	1005	10	19.7147	1	NA	Invertebrate	Carnivore	2	1.69897	2	Open
348	Zosterops meyeni	Lowland White-eye	Passeriformes	Zosteropidae	LC	Yes	316000	1000	500	9	19.0428	3	Low	Invertebrate	Carnivore	2	1.22185	4	Open
349	Zosterops japonicus	Mountain White-eye	Passeriformes	Zosteropidae	LC	No	16300000	2590	1295	10	21.7951	3	NA	Invertebrate	Carnivore	2	1.22185	4	Open
350	Mixornis gularis	Pin-striped Tit-babbler	Passeriformes	Timaliidae	LC	No	11000000	755	622.5	14.025	9.26361	4	Medium	Invertebrate	Carnivore	1	1.39794	3.5	Closed
351	Macronus striaticeps	Brown Tit-babbler	Passeriformes	Timaliidae	LC	Yes	359000	1500	750	16.5	16.1854	2	High	Invertebrate	Carnivore	2	1.39794	2.5	Closed
352	Malacopteron palawanense	Melodious Babbler	Passeriformes	Pellorneidae	NT	Yes	11000	500	250	32.11	9.18337	2	High	Invertebrate	Carnivore	1	1.69897	2	Open
353	Trichastoma cinereiceps	Ashy-headed Babbler	Passeriformes	Pellorneidae	LC	Yes	32600	1300	650	23.92	8.24006	2	Medium	Invertebrate	Carnivore	2	1.39794	2	Open
354	Leonardina woodi	Bagobo Babbler	Passeriformes	Pellorneidae	LC	Yes	78200	1300	1150	21	7.53086	1	High	Invertebrate	Carnivore	1	2	NA	Open
355	Ptilocichla mindanensis	Striated Wren-babbler	Passeriformes	Pellorneidae	LC	Yes	232000	1000	500	29.2	7.05907	2	High	Invertebrate	Carnivore	1	1.69897	1	Open
356	Ptilocichla falcata	Falcated Wren-babbler	Passeriformes	Pellorneidae	VU	Yes	22600	800	400	31.1	7.53861	2	High	Invertebrate	Carnivore	2	1.39794	1.5	Open
357	Sitta frontalis	Velvet-fronted Nuthatch	Passeriformes	Sittidae	LC	No	15600000	1490	1085	12.75	23.0638	3	High	Invertebrate	Carnivore	1	1.52288	4.5	Closed
358	Sitta oenochlamys	Sulphur-billed Nuthatch	Passeriformes	Sittidae	LC	Yes	693000	2600	1300	16.35	18.9182	1	High	Invertebrate	Carnivore	1	2	NA	Closed
359	Rhabdornis mystacalis	Stripe-headed Rhabdornis	Passeriformes	Sturnidae	LC	Yes	654000	1200	600	25.6	23.1234	2	High	Invertebrate	Carnivore	2	1.39794	NA	Closed
360	Rhabdornis grandis	Grand Rhabdornis	Passeriformes	Sturnidae	LC	Yes	41600	1250	625	45.5	30.3691	1	High	Invertebrate	Carnivore	3	1.52288	NA	Closed
361	Rhabdornis rabori	Visayan Rhabdornis	Passeriformes	Sturnidae	VU	Yes	41000	950	1275	39.1	30.3691	1	High	Omnivore	Carnivore	2	1.69897	NA	Closed
362	Rhabdornis inornatus	Stripe-breasted Rhabdornis	Passeriformes	Sturnidae	LC	Yes	252000	200	900	39.1	30.3691	1	High	Invertebrate	Carnivore	2	1.69897	NA	Closed
363	Goodfellowia miranda	Apo Myna	Passeriformes	Sturnidae	NT	Yes	9200	1650	2075	110	22.5294	1	High	Fruit	Herbivore	2	1.69897	NA	Closed
364	Sarcops calvus	Coleto	Passeriformes	Sturnidae	LC	Yes	833000	1500	750	142	21.3902	4	Medium	Fruit	Herbivore	2	1.09691	2.5	Closed
365	Gracula religiosa	Common Hill Myna	Passeriformes	Sturnidae	LC	No	12500000	1700	1150	192	27.1562	4	Medium	Fruit	Herbivore	4	0.79588	2	Closed
366	Aplonis panayensis	Asian Glossy Starling	Passeriformes	Sturnidae	LC	No	10400000	700	350	56.2	34.1473	5	Medium	Fruit	Herbivore	3	0.823909	3.5	Open
367	Aplonis minor	Short-tailed Starling	Passeriformes	Sturnidae	LC	No	3110000	600	1200	42	34.6608	3	High	Fruit	Herbivore	2	1.22185	2.5	Closed
368	Zoothera andromedae	Sunda Thrush	Passeriformes	Turdidae	LC	No	6790000	1810	1355	108	27.2378	1	High	Invertebrate	Carnivore	2	1.69897	2.5	Open
369	Geokichla cinerea	Ashy Thrush	Passeriformes	Turdidae	VU	Yes	233000	960	570	63	29.4546	1	Medium	Invertebrate	Carnivore	2	1.69897	2.5	Open
370	Geokichla interpres	Chestnut-capped Thrush	Passeriformes	Turdidae	EN	No	4270000	800	600	81.91	24.1184	3	Medium	Invertebrate	Carnivore	3	1.04576	2.5	Open
371	Turdus poliocephalus	Island Thrush	Passeriformes	Turdidae	LC	No	21900000	2000	1750	61.95	23.9327	5	High	Invertebrate	Carnivore	5	0.60206	2	Open
372	Copsychus mindanensis	Philippine Magpie-robin	Passeriformes	Muscicapidae	LC	Yes	851000	1900	950	32.85	18.5934	4	Medium	Invertebrate	Carnivore	3	0.920819	2	Open
373	Kittacincla luzoniensis	White-browed Shama	Passeriformes	Muscicapidae	LC	Yes	212000	1000	500	24	11.4774	2	High	Invertebrate	Carnivore	1	1.69897	2	Open
374	Kittacincla superciliaris	Visayan Shama	Passeriformes	Muscicapidae	LC	Yes	64300	1000	500	24.05	11.4774	2	High	Invertebrate	Carnivore	1	1.69897	2	Open
375	Kittacincla nigra	White-vented Shama	Passeriformes	Muscicapidae	LC	Yes	48200	500	250	28	14.7208	2	Medium	Invertebrate	Carnivore	1	1.69897	2	Open
376	Kittacincla cebuensis	Black Shama	Passeriformes	Muscicapidae	EN	Yes	6600	1000	500	40.88	15.1076	4	Medium	Invertebrate	Carnivore	1	1.39794	2.5	Open
377	Muscicapa randi	Ashy-breasted Flycatcher	Passeriformes	Muscicapidae	VU	Yes	331000	1200	600	20.12	21.374	1	High	Invertebrate	Carnivore	1	2	NA	Open
378	Eumyias panayensis	Turquoise Flycatcher	Passeriformes	Muscicapidae	LC	No	2120000	1600	1600	19.8	16.2312	1	Medium	Invertebrate	Carnivore	1	2	2.5	Open
379	Cyornis ruficauda	Rufous-tailed Jungle-flycatcher	Passeriformes	Muscicapidae	LC	No	1110000	2000	1000	17.65	20.784	1	High	Invertebrate	Carnivore	1	2	2.5	Open
380	Cyornis herioti	Blue-breasted Blue-flycatcher	Passeriformes	Muscicapidae	NT	Yes	119000	1100	650	18	17.0644	1	Medium	Invertebrate	Carnivore	1	2	3	Open
381	Cyornis camarinensis	Rufous-breasted Blue-flycatcher	Passeriformes	Muscicapidae	VU	Yes	31500	1100	650	19.7	17.0644	1	Medium	Invertebrate	Carnivore	1	2	NA	Open
382	Cyornis lemprieri	Palawan Blue-flycatcher	Passeriformes	Muscicapidae	NT	Yes	50900	1000	500	21.5	18.9951	1	High	Invertebrate	Carnivore	1	2	3	Open
383	Cyornis rufigastra	Mangrove Blue-flycatcher	Passeriformes	Muscicapidae	LC	No	6080000	1000	500	16	15.7163	5	Medium	Invertebrate	Carnivore	1	1.30103	2	Open
384	Vauriella albigularis	White-throated Jungle-flycatcher	Passeriformes	Muscicapidae	EN	Yes	41100	950	475	32	14.7499	1	Medium	Invertebrate	Carnivore	1	2	2.5	Open
385	Vauriella insignis	White-browed Jungle-flycatcher	Passeriformes	Muscicapidae	VU	Yes	40300	1950	1925	32	13.5404	1	High	Invertebrate	Carnivore	1	2	2.5	Open
386	Vauriella goodfellowi	Slaty-backed Jungle-flycatcher	Passeriformes	Muscicapidae	NT	Yes	7700	1900	1950	32	15.266	1	High	Invertebrate	Carnivore	1	2	2.5	Open
387	Brachypteryx poliogyna	Philippine Shortwing	Passeriformes	Muscicapidae	LC	Yes	859000	1400	1300	17.5	9.91057	2	Medium	Invertebrate	Carnivore	1	1.69897	2.5	Closed
388	Ficedula westermanni	Little Pied Flycatcher	Passeriformes	Muscicapidae	LC	No	14700000	2725	1637.5	7.6	22.0483	4	Medium	Invertebrate	Carnivore	1	1.39794	2.5	Open
389	Ficedula basilanica	Little Slaty Flycatcher	Passeriformes	Muscicapidae	VU	Yes	264000	1000	500	13.6	13.0417	2	Medium	Invertebrate	Carnivore	1	1.69897	2	Open
390	Ficedula luzoniensis	Thicket Flycatcher	Passeriformes	Muscicapidae	LC	Yes	923000	500	1250	8.25	20.9969	1	Medium	Invertebrate	Carnivore	1	2	3	Open
391	Ficedula crypta	Cryptic Flycatcher	Passeriformes	Muscicapidae	LC	Yes	77300	800	1100	12	16.1443	2	Medium	Invertebrate	Carnivore	1	1.69897	2.5	Open
392	Ficedula disposita	Furtive Flycatcher	Passeriformes	Muscicapidae	NT	Yes	60000	510	505	11.46	13.945	3	Medium	Invertebrate	Carnivore	1	1.52288	2.5	Open
393	Ficedula platenae	Palawan Flycatcher	Passeriformes	Muscicapidae	VU	Yes	23300	1000	500	12	13.537	2	High	Invertebrate	Carnivore	1	1.69897	2.5	Open
394	Phoenicurus bicolor	Luzon Water-redstart	Passeriformes	Muscicapidae	NT	Yes	95300	2600	1600	16.95	20.956	4	Non-forest	Invertebrate	Carnivore	1	1.39794	3	NA
395	Saxicola caprata	Pied Bushchat	Passeriformes	Muscicapidae	LC	No	30300000	2850	1425	17.55	11.2557	7	Non-forest	Invertebrate	Carnivore	1	1.1549	3.5	Closed
396	Irena tweeddalii	Palawan Fairy-bluebird	Passeriformes	Irenidae	NT	Yes	42400	700	350	68.75	23.2114	1	High	Fruit	Herbivore	3	1.52288	2.5	Open
397	Irena cyanogastra	Philippine Fairy-bluebird	Passeriformes	Irenidae	NT	Yes	655000	1500	750	83.175	21.2307	1	High	Nectar	Herbivore	1	2	2.5	Open
398	Chloropsis palawanensis	Yellow-throated Leafbird	Passeriformes	Chloropseidae	LC	Yes	47800	1000	500	30.31	13.2915	2	High	Invertebrate	Carnivore	2	1.39794	2.5	Open
399	Chloropsis flavipennis	Philippine Leafbird	Passeriformes	Chloropseidae	VU	Yes	257000	970	485	35.4	14.3444	1	Medium	Invertebrate	Carnivore	3	1.52288	2.5	Open
400	Prionochilus olivaceus	Olive-backed Flowerpecker	Passeriformes	Dicaeidae	LC	Yes	654000	1000	500	9	17.5138	2	Medium	Fruit	Herbivore	2	1.39794	1.5	Closed
401	Prionochilus plateni	Palawan Flowerpecker	Passeriformes	Dicaeidae	LC	Yes	45500	500	250	8.5	15.9243	3	Medium	Fruit	Herbivore	2	1.22185	1.5	Closed
402	Dicaeum proprium	Whiskered Flowerpecker	Passeriformes	Dicaeidae	LC	Yes	81500	2000	1900	10.2	26.9703	2	Medium	Fruit	Herbivore	2	1.39794	2	Closed
403	Dicaeum anthonyi	Yellow-crowned Flowerpecker	Passeriformes	Dicaeidae	NT	Yes	57200	1300	1450	11.3	19.341	1	High	Fruit	Herbivore	2	1.69897	2	Closed
404	Dicaeum kampalili	Flame-crowned Flowerpecker	Passeriformes	Dicaeidae	LC	Yes	107000	1200	1400	11.5	19.341	1	High		Herbivore	2	1.69897	3	Closed
405	Dicaeum bicolor	Bicoloured Flowerpecker	Passeriformes	Dicaeidae	LC	Yes	633000	1500	750	8.9	15.1835	2	Medium	Fruit	Herbivore	2	1.39794	2	Closed
406	Dicaeum trigonostigma	Orange-bellied Flowerpecker	Passeriformes	Dicaeidae	LC	No	10000000	1800	900	6.625	16.7862	4	Medium	Fruit	Herbivore	4	0.79588	2.5	Closed
407	Dicaeum australe	Red-keeled Flowerpecker	Passeriformes	Dicaeidae	LC	Yes	670000	1000	500	9	14.622	2	Medium	Fruit	Herbivore	3	1.22185	2	Closed
408	Dicaeum haematostictum	Black-belted Flowerpecker	Passeriformes	Dicaeidae	VU	Yes	41100	850	825	9.6	16.3486	2	Medium	Fruit	Herbivore	4	1.09691	1	Closed
409	Dicaeum retrocinctum	Scarlet-collared Flowerpecker	Passeriformes	Dicaeidae	VU	Yes	46400	1200	600	6	17.6802	2	Medium	Fruit	Herbivore	2	1.39794	2	Closed
410	Dicaeum quadricolor	Cebu Flowerpecker	Passeriformes	Dicaeidae	CR	Yes	700	500	250	9.6	17.1154	1	High	Fruit	Herbivore	2	1.69897	2	Closed
411	Dicaeum hypoleucum	Buzzing Flowerpecker	Passeriformes	Dicaeidae	LC	Yes	842000	1800	900	8	18.2806	1	Medium	Fruit	Herbivore	2	1.69897	2	Closed
412	Dicaeum nigrilore	Olive-capped Flowerpecker	Passeriformes	Dicaeidae	LC	Yes	82700	450	1125	11	20.2534	1	High	Fruit	Herbivore	2	1.69897	2	Closed
413	Dicaeum pygmaeum	Pygmy Flowerpecker	Passeriformes	Dicaeidae	LC	Yes	929000	2000	1000	5.2	16.6302	2	Medium	Fruit	Herbivore	2	1.39794	2	Closed
414	Dicaeum luzoniense	Fire-throated Flowerpecker	Passeriformes	Dicaeidae	LC	Yes	653000	3400	2250	6	23.2818	1	Medium	Fruit	Herbivore	2	1.69897	2.5	Closed
415	Arachnothera dilutior	Palawan Spiderhunter	Passeriformes	Nectariniidae	LC	Yes	32600	1000	500	10.5	14.129	3	Medium	Omnivore	Carnivore	3	1.04576	2.5	NA
416	Arachnothera flammifera	Orange-tufted Spiderhunter	Passeriformes	Nectariniidae	LC	Yes	267000	1000	500	10.9	14.129	3	Medium	Omnivore	Carnivore	3	1.04576	2.5	NA
417	Arachnothera clarae	Naked-faced Spiderhunter	Passeriformes	Nectariniidae	LC	Yes	602000	1400	700	30.8	12.6857	3	Medium	Nectar	Herbivore	2	1.22185	2	Closed
418	Anthreptes malacensis	Brown-throated Sunbird	Passeriformes	Nectariniidae	LC	No	9000000	1200	600	11.825	18.2965	7	Medium	Invertebrate	Carnivore	3	0.677781	2.5	Closed
419	Anthreptes griseigularis	Grey-throated Sunbird	Passeriformes	Nectariniidae	LC	Yes	443000	610	305	11.825	16.8355	5	Medium	Omnivore	Herbivore	3	0.823909	2.5	Closed
420	Leptocoma sperata	Purple-throated Sunbird	Passeriformes	Nectariniidae	LC	No	1400000	1220	610	7.5	21.4146	6	Medium	Nectar	Herbivore	4	0.619789	2	Closed
421	Leptocoma brasiliana	Maroon-bellied Sunbird	Passeriformes	Nectariniidae	LC	No	7340000	1220	610	6	16.3238	4	Medium	Omnivore	Herbivore	3	0.920819	2	Closed
422	Leptocoma juliae	Orange-lined Sunbird	Passeriformes	Nectariniidae	LC	Yes	177000	500	250	6	21.4146	2	Medium	No Information	Herbivore	3	1.22185	2	Closed
423	Leptocoma calcostetha	Copper-throated Sunbird	Passeriformes	Nectariniidae	LC	No	5080000	915	457.5	7.2	16.0127	3	Medium	Nectar	Herbivore	2	1.22185	2	Closed
424	Cinnyris jugularis	Olive-backed Sunbird	Passeriformes	Nectariniidae	LC	No	22400000	1700	850	8.45	17.6907	7	Low	Nectar	Herbivore	3	0.677781	2	Closed
425	Aethopyga shelleyi	Lovely Sunbird	Passeriformes	Nectariniidae	LC	Yes	42400	2000	1000	3.9	15.5811	2	Medium	Nectar	Herbivore	3	1.22185	3	Closed
426	Aethopyga siparaja	Crimson Sunbird	Passeriformes	Nectariniidae	LC	No	12500000	1750	925	6.925	17.4526	6	Medium	Nectar	Herbivore	2	0.920819	2	Closed
427	Aethopyga magnifica	Magnificent Sunbird	Passeriformes	Nectariniidae	LC	Yes	76600	1000	500	8	17.4526	3	Medium	Invertebrate	Carnivore	3	1.04576	2.5	Closed
428	Aethopyga pulcherrima	Metallic-winged Sunbird	Passeriformes	Nectariniidae	LC	Yes	673000	1000	1000	6.2	16.5813	3	Medium	Nectar	Herbivore	3	1.04576	3	Closed
429	Aethopyga flagrans	Flaming Sunbird	Passeriformes	Nectariniidae	LC	Yes	212000	1350	675	7	13.6828	2	Medium	Nectar	Herbivore	3	1.22185	2.5	Closed
430	Aethopyga guimarasensis	Maroon-naped Sunbird	Passeriformes	Nectariniidae	LC	Yes	41100	1350	675	7	13.6828	2	Medium	Nectar	Herbivore	3	1.22185	3	Closed
431	Aethopyga bella	Handsome Sunbird	Passeriformes	Nectariniidae	LC	Yes	877000	2000	1000	4.125	15.8388	3	Medium	Unsure	Herbivore	3	1.04576	3	Closed
432	Aethopyga linaraborae	Lina's Sunbird	Passeriformes	Nectariniidae	NT	Yes	3600	980	1490	6.85	18.8616	1	High	Nectar	Herbivore	3	1.52288	2.5	Closed
433	Aethopyga primigenia	Grey-hooded Sunbird	Passeriformes	Nectariniidae	LC	Yes	44000	700	1350	7	15.8051	1	Medium	Nectar	Herbivore	3	1.52288	2.5	Closed
434	Aethopyga boltoni	Apo Sunbird	Passeriformes	Nectariniidae	LC	Yes	31600	800	1900	7.225	16.8581	2	Medium	Nectar	Herbivore	3	1.22185	2.5	Closed
435	Lonchura fuscans	Dusky Munia	Passeriformes	Estrildidae	LC	No	1150000	500	250	9.5	17.1171	4	Low	Seed	Herbivore	1	1.39794	5	Closed
436	Lonchura punctulata	Scaly-breasted Munia	Passeriformes	Estrildidae	LC	No	23000000	2285	1142.5	13.6	21.7886	4	Low	Seed	Herbivore	3	0.920819	6.5	Closed
437	Lonchura leucogastra	White-bellied Munia	Passeriformes	Estrildidae	LC	No	6260000	1000	500	11.4	19.7143	3	Low	Seed	Herbivore	1	1.52288	5	Closed
438	Lonchura atricapilla	Chestnut Munia	Passeriformes	Estrildidae	LC	No	13200000	2100	1050	13	18.9637	4	Non-forest	Seed	Herbivore	1	1.39794	5.5	Closed
439	Erythrura hyperythra	Tawny-breasted Parrotfinch	Passeriformes	Estrildidae	LC	No	5500000	2000	2000	11	23.1376	3	Medium	Seed	Herbivore	3	1.04576	4	Closed
440	Erythrura viridifacies	Green-faced Parrotfinch	Passeriformes	Estrildidae	VU	Yes	264000	1900	1950	12.6	28.0615	3	Low	Seed	Herbivore	1	1.52288	3	Closed
441	Erythrura coloria	Red-eared Parrotfinch	Passeriformes	Estrildidae	LC	Yes	57400	450	1375	11	18.6313	3	Medium	Seed	Herbivore	2	1.22185	1.5	Closed
442	Hypocryptadius cinnamomeus	Cinnamon Ibon	Passeriformes	Passeridae	LC	Yes	80900	1900	1950	30	22.0023	1	High	Invertebrate	Carnivore	1	2	NA	Closed
443	Anthus rufulus	Paddyfield Pipit	Passeriformes	Motacillidae	LC	No	20000000	1800	900	20.05	21.5592	5	Non-forest	Invertebrate	Carnivore	3	0.823909	3.5	Open
444	Pyrrhula leucogenis	White-cheeked Bullfinch	Passeriformes	Fringillidae	LC	Yes	299000	500	1500	24.8	17.253	1	Medium	Seed	Herbivore	3	1.52288	3.5	Open
445	Loxia curvirostra	Red Crossbill	Passeriformes	Fringillidae	LC	No	129000000	200	900	42.675	34.6945	2	Medium	Seed	Herbivore	4	1.09691	3.5	Open
446	Chrysocorythus mindanensis	Mindanao Serin	Passeriformes	Fringillidae	NT	Yes	4300	800	1900	16	23.1343	1	Medium	Herbavore	Herbivore	3	1.52288	NA	Open
